# Supplementary material
Source: Springer Nature journal article supplement (https://www.springermedizin.de/resource/supplementary/12889_2007_1165_MOESM3_ESM.pdf/9502594)
Supplement: MOESM3 [file 9502594]

369 survey distribution attempts

49 invalid attempts (20 vacant lots/houses, 15 commercial properties, 11 invalid addresses, 2 householder away indefinitely, 1 no English)

320 surveys for distribution

First round

79 face-to-face interviews completed

241 surveys left with householder or in post box

Second round

12 face-to-face interviews completed

80 self-administered surveys collected

149 surveys left with householder or in post box

Third round

56 self-administered surveys posted in

93 surveys not returned

227 completed and returned (91 face-to-face, 136 self-administered)

12 households away from Newcastle / Lake Macquarie during the storm period

215 valid responses
